# Supplementary material
Source: Springer Nature journal article supplement (https://www.springermedizin.de/resource/supplementary/12874_2012_998_MOESM7_ESM.pdf/9433016)
Supplement: MOESM7 [file 9433016]

Total number of references identified from the updated electronic searches = 38,452

Duplicates removed = 5825

References selected for further examination of titles and abstracts  
N = 32,627

Manual literature searches = 4

Articles selected for full evaluation for inclusion in the review  
N = 154

Reasons for exclusions  
No info on construction, development and/or psychometric properties=40  
-Tool included in original review=39  
-Tool not specific for RCT assessment=23  
-Modified existing tool= 20  
-Not a quality assessment tool=11  
-Tool developed for single review purposes=8  
- Animal research= 4  
-No focus on a particular tool=2  
-Name of scale not reported=1

Included studies  
N = 6

Excluded  
N = 148

New tools from update  
N = 5

Tools identified in previous SR  
- N = 21  
- PT = 7  
- General = 14

Total number of tools analyzed  
N = 26
